# Supplementary material for: Tailoring of optical properties of fluorescein using green synthesized gold nanoparticles
Source: Royal Society of Chemistry journal article supplement (doi:10.1039/c5cp02029h), 2015-01-01
Supplement: c5cp02029h1.pdf [file c5cp02029h1.pdf]

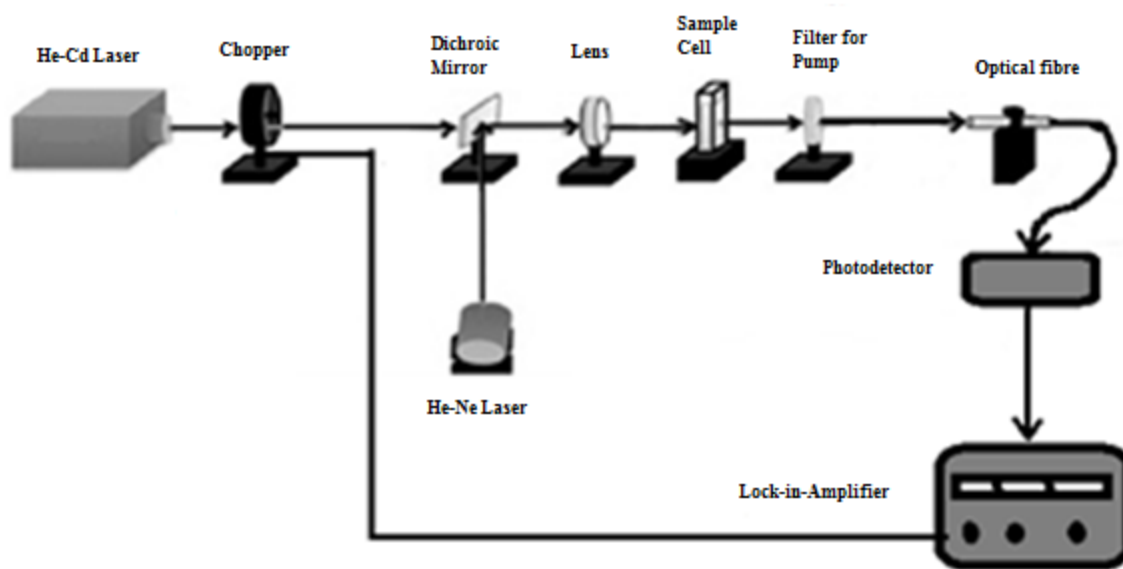

Figure S1. Schematic view of the thermal lens setup.

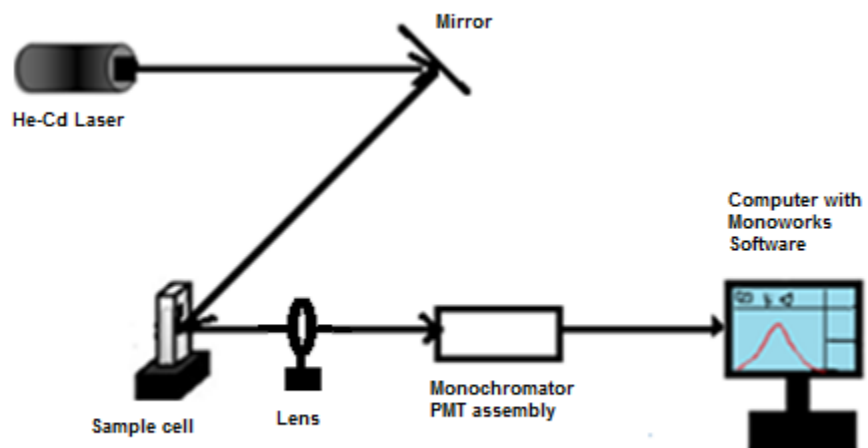

Figure S2. Schematic diagram of fluorescence measurement setup.

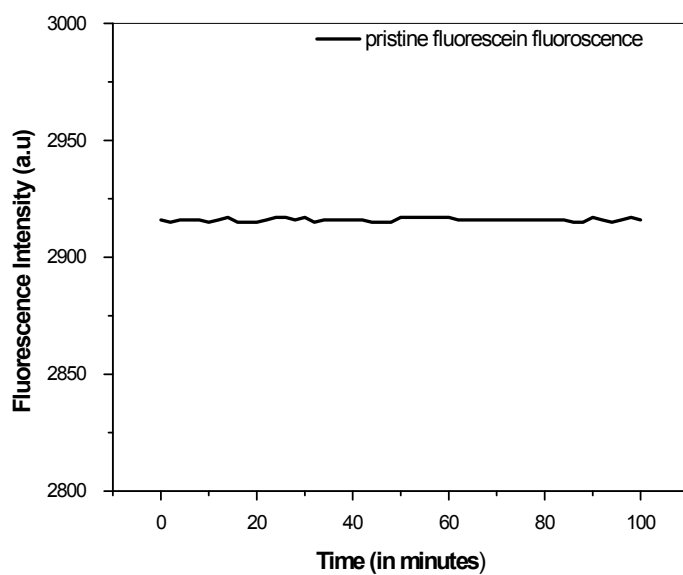

Figure S3. Temporal variation of fluorescence intensity fluorescein under 442 nm excitation
